# Supplementary material for: A Branch-Price-and-Cut Algorithm for a Production-Routing Problem with Short-Life-Span Products
Source: Atypon-hosted journal article supplement (doi:10.1287/trsc.2018.0854), 2019-05-14
Supplement: trsc.2018.0854.sm1.pdf [file trsc.2018.0854.sm1.pdf]

## Appendix A: Lifting procedure for the GDT branching strategy

This appendix describes the lifting procedure used to find delayed due times yielding the same lower bound in the GDT branching strategy. It consists of an iterative greedy procedure (see Algorithm 1) which is based on a modified version of the MILP (42)–(55).

Let  $N_i$ ,  $i \in \mathcal{O}$ , be the maximum number of periods by which the due time of order  $i$  can be delayed (with respect to  $b^{\hat{t}_i}$ ). The procedure starts at iteration  $k = 1$  with the subset of orders  $\mathcal{O}^k$  whose due times can be delayed. Then it enters a repeat loop which begins by solving the following MILP that we denote  $PL^k$ . For each order  $i \in \mathcal{O}^k$ , we define  $N_i$  binary variables  $\zeta_i^j$ ,  $j = 1, \dots, N_i$ . Variable  $\zeta_i^j$  takes value 1 if the due time of order  $i$  is delayed by  $j$  periods and 0 otherwise. For  $k = 1$ , we set  $\underline{M}^{ptk} = \underline{M}^{pt}$  for all  $p \in \mathcal{P}$  and  $t \in \mathcal{T}$ . Finally, let  $\epsilon$  be a sufficiently small positive scalar.

With this notation, MILP  $PL^k$  writes as:

$$(PL^k) \quad \min \quad \sum_{i \in \mathcal{O}^k} \sum_{j=1}^{N_i} j \zeta_i^j \quad (56)$$

$$\text{s.t.} \quad \sum_{t \in \mathcal{T}} \gamma^E n^{SP} w^t + \sum_{p \in \mathcal{P}} \sum_{u \in \mathcal{U}} \gamma^S \beta^{pu} \leq \underline{z} - \epsilon, \quad (57)$$

$$\sum_{\substack{u \in \mathcal{U}^p \\ e^u \leq e^t}} q^{pu} \geq \underline{M}^{ptk} - \sum_{\substack{i \in \mathcal{O}^k \\ \hat{t}_i = t}} d_i^p \left( \sum_{j=1}^{N_i} \zeta_i^j \right) + \sum_{\substack{i \in \mathcal{O}^k \\ \hat{t}_i < t \leq \hat{t}_i + N_i}} d_i^p \zeta_i^{t - \hat{t}_i}, \quad \forall p \in \mathcal{P}, t \in \mathcal{T} \quad (58)$$

$$\sum_{j=1}^{N_i} \zeta_i^j \leq 1, \quad \forall i \in \mathcal{O}^k \quad (59)$$

$$\zeta_i^j \in \{0, 1\}, \quad \forall i \in \mathcal{O}^k, j \in \{1, 2, \dots, N_i\} \quad (60)$$

$$(44) - (55).$$

Objective function (56) aims at minimizing the total number of periods of delay of the orders to obtain production costs that are less than  $\underline{z}$  (imposed by constraint (57)). Constraints (58) impose production due times adjusted according to the selected delays. Constraints (59) ensure that at most one delay is chosen for each order and (60) express the binary requirements on the  $\zeta_i^j$  variables. Finally, constraints (44)–(55) must still be considered.

If  $PL^k$  is feasible, then the computed optimal solution indicates for which orders the due times must be delayed and by how many periods to obtain production costs that are less than  $\underline{z}$ . Given that the number of delayed periods is minimized in  $PL^k$ , removing one of these delayed periods yields due times that incur production costs of at least  $\underline{z}$ . Hence, in Steps 8 and 9, all proposed delays are applied except for one period for one arbitrarily selected order  $i^*$  (chosen as the first in  $\mathcal{O}^*$  for our tests). Then, the minimum quantities to produce of each product in each period according to the due times are updated in Step 10 before starting a new iteration. The repeat loop stops in two cases: either  $\mathcal{O}^*$  becomes empty or  $PL^k$  is infeasible in which case the due times of all orders in  $\mathcal{O}^k$  can be delayed to their maximum as it is not possible to find a feasible solution yielding a cost less than  $\underline{z}$ .

Note that this procedure is valid only if  $PL^k$  is solved exactly at each iteration. Nevertheless, to avoid long computational times, we limit the number of nodes to explore in the search tree when solving  $PL^k$ . When

---

**Algorithm 1** Lifting procedure for the GDT branching

---

- 1: Set  $k := 1$ ,  $STOP := false$ ,  $\mathcal{O}^k = \{i \in \mathcal{O} \mid N_i \geq 1\}$
  - 2: **repeat**
  - 3:   Solve MILP  $PL^k$
  - 4:   **if**  $PL^k$  is feasible **then**
  - 5:      $\mathcal{O}^* := \{i \in \mathcal{O}^k \mid \sum_{j=1}^{N_i} \zeta_i^j = 1\}$
  - 6:      $\forall i \in \mathcal{O}^*$ , set  $j^*(i) := j$  where  $j \in \{1, \dots, N_i\}$  is such that  $\zeta_i^j = 1$
  - 7:     Choose  $i^* \in \mathcal{O}^*$
  - 8:     Set  $\hat{t}_{i^*} := \hat{t}_{i^*} + j^*(i^*) - 1$
  - 9:      $\forall i \in \mathcal{O}^* \setminus \{i^*\}$ , set  $\hat{t}_i := \hat{t}_i + j^*(i)$
  - 10:     $\forall p \in \mathcal{P}, t \in \mathcal{T}$ , set  $\underline{M}^{pt, k+1} := \underline{M}^{ptk} - \sum_{\substack{i \in \mathcal{O}^k \\ \hat{t}_i = t}} d_i^p \left( \sum_{j=1}^{N_i} \zeta_i^j \right) + \sum_{\substack{i \in \mathcal{O}^k \\ \hat{t}_i < t \leq \hat{t}_i + N_i}} d_i^p \zeta_i^{t - \hat{t}_i}$
  - 11:    Set  $\mathcal{O}^{k+1} := \mathcal{O}^k \setminus \mathcal{O}^*$
  - 12:    **if**  $\mathcal{O}^* = \emptyset$  **then**
  - 13:     Set  $STOP := true$
  - 14:    **else**
  - 15:      $\forall i \in \mathcal{O}^k$ , set  $\hat{t}_i := \hat{t}_i + N_i$
  - 16:     Set  $STOP := true$
  - 17:     $k := k + 1$
  - 18: **until**  $STOP = true$
- 

this limit is reached, the procedure is exited immediately without delaying the due times of any additional orders.

## Appendix B: Detailed Results for the Exact Algorithms

In this appendix, we present the results obtained by the exact algorithms with the GDT branching, with the GDT branching and the lifting strategy, and without the GDT branching for all 108 tested instances with 15, 20, or 25 customers. The name of an instance takes the form  $nO-mP-vD-wL-x$  where  $nO-mP-vD-wL$  indicates the instance class as described in Section 6.2 and  $x \in \{1, 2, 3\}$  gives the instance number in this class. The results are reported in Tables 10–12. In these tables, beside specifying the total computational time and number of branch-and-bound nodes explored for each instance and algorithm, we provide for each instance the computational time required in the root node including the generation of cuts (Root Time), the lower bound at the root node before adding cuts (LP Bound) and after adding cuts (Root Bound), and the best upper bound computed in all our tests (Best UB). Furthermore, for each instance and each algorithm, we give the lower bound reached at the end of the solution process (End Bound). On the last line of each table, we indicate the average time at the root node, and for each algorithm, the average computational time, the average number of nodes explored and the number of instances solved to optimality. Finally, in each row, we put in bold the best computational time achieved by the algorithms, unless none could solve the instance to optimality. In this case, we highlight the best end bound.

**Table 10 Results for instances with 15 customers**

| Instance       |               |          |            |         | With GDT    |         |                   | With GDT + Lift |         |               | Without GDT |         |            |
|----------------|---------------|----------|------------|---------|-------------|---------|-------------------|-----------------|---------|---------------|-------------|---------|------------|
|                | Root Time (s) | LP Bound | Root Bound | Best UB | Time (s)    | # Nodes | End Bound         | Time (s)        | # Nodes | End Bound     | Time (s)    | # Nodes | End Bound  |
| 15O-2P-oD-1L-1 | 0.2           | 446.00   | 452.50     | 462.00  | 4           | 48      | 462.00            | 8               | 43      | 462.00        | 1           | 25      | 462.00     |
| 15O-2P-oD-1L-2 | 0.3           | 430.10   | 464.50     | 475.75  | 1           | 16      | 475.75            | 4               | 19      | 475.75        | 11          | 179     | 475.75     |
| 15O-2P-oD-1L-3 | 0.2           | 326.62   | 329.00     | 350.00  | <b>16</b>   | 374     | 350.00            | 44              | 642     | 350.00        | 133         | 2005    | 350.00     |
| 15O-3P-oD-1L-1 | 0.2           | 447.00   | 460.25     | 469.00  | 4           | 33      | 469.00            | 20              | 37      | 469.00        | 84          | 1054    | 469.00     |
| 15O-3P-oD-1L-2 | 0.6           | 430.38   | 439.77     | 478.25  | 7200        | 63,424  | <b>477.82</b>     | 7200            | 63,816  | <b>477.82</b> | 7200        | 58,306  | 476.75     |
| 15O-3P-oD-1L-3 | 0.1           | 336.12   | 338.50     | 363.00  | <b>245</b>  | 1296    | 363.00            | 268             | 1309    | 363.00        | 370         | 1931    | 363.00     |
| 15O-4P-oD-1L-1 | 0.2           | 448.00   | 455.97     | 469.00  | 118         | 1318    | 469.00            | <b>64</b>       | 121     | 469.00        | 130         | 883     | 469.00     |
| 15O-4P-oD-1L-2 | 0.5           | 426.87   | 464.85     | -       | 7200        | 142,078 | <b>477.75</b>     | 7200            | 130,891 | <b>477.75</b> | 7200        | 62,916  | 476.75     |
| 15O-4P-oD-1L-3 | 0.4           | 337.12   | 339.82     | 364.00  | 1211        | 5253    | 364.00            | <b>1198</b>     | 5253    | 364.00        | 1208        | 4993    | 364.00     |
| 15O-2P-dD-1L-1 | 0.2           | 499.50   | 518.00     | 522.00  | <b>2</b>    | 26      | 522.00            | 6               | 26      | 522.00        | 3           | 96      | 522.00     |
| 15O-2P-dD-1L-2 | 0.3           | 506.11   | 517.87     | -       | 7200        | 151,066 | <b>546.25</b>     | 7200            | 116,095 | <b>546.25</b> | 7200        | 127,126 | 545.25     |
| 15O-2P-dD-1L-3 | 0.2           | 365.12   | 367.82     | 388.50  | <b>29</b>   | 483     | 388.50            | 56              | 651     | 388.50        | 59          | 870     | 388.50     |
| 15O-3P-dD-1L-1 | 0.4           | 546.78   | 572.19     | 583.75  | 233         | 2046    | 583.75            | 231             | 2046    | 583.75        | <b>207</b>  | 2046    | 583.75     |
| 15O-3P-dD-1L-2 | 0.7           | 525.13   | 567.15     | 597.50  | 6186        | 43,767  | 597.50            | <b>5980</b>     | 36,691  | 597.50        | 7200        | 42,538  | 596.75     |
| 15O-3P-dD-1L-3 | 0.3           | 381.30   | 384.09     | 409.00  | 346         | 2016    | 409.00            | <b>258</b>      | 1185    | 409.00        | 578         | 3281    | 409.00     |
| 15O-4P-dD-1L-1 | 0.4           | 547.75   | 566.50     | 577.75  | <b>30</b>   | 288     | 577.75            | 102             | 772     | 577.75        | 4259        | 22,354  | 577.75     |
| 15O-4P-dD-1L-2 | 0.6           | 505.51   | 515.49     | -       | 7200        | 40,868  | <b>548.25</b>     | 7200            | 57,844  | <b>548.25</b> | 7200        | 40,684  | 540.73     |
| 15O-4P-dD-1L-3 | 0.4           | 381.30   | 384.11     | 409.00  | <b>778</b>  | 4038    | 409.00            | 933             | 3840    | 409.00        | 2316        | 11,608  | 409.00     |
| 15O-2P-oD-2L-1 | 0.1           | 384.25   | 384.25     | 384.25  | <b>1</b>    | 10      | 384.25            | <b>1</b>        | 10      | 384.25        | <b>1</b>    | 10      | 384.25     |
| 15O-2P-oD-2L-2 | 0.9           | 375.69   | 385.75     | 399.75  | <b>94</b>   | 806     | 399.75            | 324             | 3052    | 399.75        | 7200        | 33,429  | 398.85     |
| 15O-2P-oD-2L-3 | 0.2           | 301.52   | 303.51     | 326.25  | 16          | 242     | 326.25            | 11              | 181     | 326.25        | <b>7</b>    | 131     | 326.25     |
| 15O-3P-oD-2L-1 | 0.1           | 393.75   | 393.75     | 393.75  | <b>2</b>    | 11      | 393.75            | <b>2</b>        | 11      | 393.75        | <b>2</b>    | 11      | 393.75     |
| 15O-3P-oD-2L-2 | 1.5           | 385.05   | 390.62     | 408.25  | 816         | 3764    | 408.25            | <b>333</b>      | 214     | 408.25        | 7200        | 33,537  | 407.25     |
| 15O-3P-oD-2L-3 | 0.3           | 310.02   | 312.05     | 334.75  | 266         | 444     | 334.75            | <b>46</b>       | 298     | 334.75        | 66          | 308     | 334.75     |
| 15O-4P-oD-2L-1 | 0.2           | 394.75   | 394.75     | 401.25  | 47          | 65      | 401.25            | <b>40</b>       | 32      | 401.25        | 429         | 885     | 401.25     |
| 15O-4P-oD-2L-2 | 0.9           | 381.96   | 389.89     | 408.25  | <b>1242</b> | 4614    | 408.25            | 1264            | 4614    | 408.25        | 7200        | 11,785  | 400.75     |
| 15O-4P-oD-2L-3 | 0.3           | 311.02   | 313.00     | 335.75  | 93          | 237     | 335.75            | <b>92</b>       | 237     | 335.75        | <b>92</b>   | 237     | 335.75     |
| 15O-2P-dD-2L-1 | 0.3           | 429.25   | 429.26     | 430.25  | 5           | 27      | 430.25            | <b>3</b>        | 13      | 430.25        | 4           | 31      | 430.25     |
| 15O-2P-dD-2L-2 | 1.6           | 434.78   | 439.03     | 483.75  | 7200        | 14,184  | <b>477.75</b>     | 7200            | 17,786  | 476.69        | 7200        | 14,190  | 476.50     |
| 15O-2P-dD-2L-3 | 0.2           | 332.31   | 334.59     | 357.50  | 182         | 1139    | 357.50            | <b>141</b>      | 859     | 357.50        | 1706        | 5635    | 357.50     |
| 15O-3P-dD-2L-1 | 0.2           | 492.50   | 492.50     | 492.50  | <b>1</b>    | 10      | 492.50            | <b>1</b>        | 10      | 492.50        | <b>1</b>    | 10      | 492.50     |
| 15O-3P-dD-2L-2 | 4.3           | 453.60   | 461.02     | 508.50  | 7200        | 4360    | 501.00            | 7200            | 8290    | 507.50        | 7200        | 7485    | 497.31     |
| 15O-3P-dD-2L-3 | 2.3           | 351.12   | 354.29     | 383.00  | <b>6092</b> | 1203    | 383.00            | 7200            | 787     | 376.43        | 7200        | 1903    | 378.49     |
| 15O-4P-dD-2L-1 | 0.3           | 486.00   | 486.00     | 487.00  | 33          | 35      | 487.00            | <b>23</b>       | 50      | 487.00        | 362         | 1161    | 487.00     |
| 15O-4P-dD-2L-2 | 0.7           | 446.68   | 452.20     | -       | 7200        | 15,366  | <b>485.75</b>     | 7200            | 12,921  | <b>485.75</b> | 7200        | 22,288  | 478.83     |
| 15O-4P-dD-2L-3 | 0.4           | 352.13   | 354.68     | 383.25  | 7200        | 5222    | 378.77            | 7200            | 11,166  | <b>380.16</b> | 7200        | 13,746  | 378.87     |
| Average        | 0.58          |          |            |         | <b>2103</b> | 14,172  | # Opt.: <b>28</b> | 2118            | 13,384  | # Opt.: 27    | 2934        | 14,713  | # Opt.: 23 |

**Table 11 Results for instances with 20 customers**

| Instance       | With GDT      |          |              | With GDT + Lift |             |           | Without GDT       |             |           |               |            |           |               |
|----------------|---------------|----------|--------------|-----------------|-------------|-----------|-------------------|-------------|-----------|---------------|------------|-----------|---------------|
|                | Root Time (s) | LP Bound | Root Best UB | Time (s)        | # Nodes     | End Bound | Time (s)          | # Nodes     | End Bound | Time (s)      | # Nodes    | End Bound |               |
| 200-2P-oD-1L-1 | 0.6           | 412.51   | 416.60       | 417.50          | <b>5</b>    | 25        | 417.50            | 6           | 25        | 417.50        | 6          | 25        | 417.50        |
| 200-2P-oD-1L-2 | 3.6           | 335.75   | 338.70       | 355.25          | 7200        | 14,463    | 351.19            | 7200        | 17,473    | <b>351.25</b> | 7200       | 12,141    | 351.25        |
| 200-2P-oD-1L-3 | 0.1           | 489.50   | 492.53       | 508.25          | <b>7</b>    | 89        | 508.25            | 17          | 104       | 508.25        | 71         | 402       | 508.25        |
| 200-3P-oD-1L-1 | 1.8           | 420.71   | 429.51       | 456.50          | 4675        | 6510      | 456.50            | <b>3910</b> | 5103      | 456.50        | 7200       | 7769      | 455.25        |
| 200-3P-oD-1L-2 | 0.4           | 337.75   | 337.90       | 347.75          | <b>242</b>  | 1010      | 347.75            | 767         | 2144      | 347.75        | 7200       | 4249      | 346.86        |
| 200-3P-oD-1L-3 | 0.5           | 514.95   | 520.52       | 544.75          | 7200        | 8204      | 537.57            | 7200        | 2182      | <b>538.50</b> | 7200       | 1964      | 537.25        |
| 200-4P-oD-1L-1 | 1.1           | 436.29   | 441.11       | 457.00          | <b>65</b>   | 71        | 457.00            | 127         | 79        | 457.00        | 2624       | 3674      | 457.00        |
| 200-4P-oD-1L-2 | 3.9           | 334.25   | 338.35       | 367.50          | <b>3799</b> | 2286      | 367.50            | 7200        | 8256      | 367.50        | 7200       | 4586      | 366.50        |
| 200-4P-oD-1L-3 | 0.2           | 500.84   | 501.22       | 527.25          | 7200        | 5126      | 518.09            | 7200        | 8260      | <b>519.65</b> | 7200       | 5849      | 517.93        |
| 200-2P-dD-1L-1 | 0.6           | 459.34   | 462.55       | 463.50          | <b>187</b>  | 987       | 463.50            | 237         | 1079      | 463.50        | 660        | 3871      | 463.50        |
| 200-2P-dD-1L-2 | 0.5           | 418.35   | 419.43       | 436.00          | <b>53</b>   | 179       | 436.00            | 76          | 210       | 436.00        | 88         | 351       | 436.00        |
| 200-2P-dD-1L-3 | 0.1           | 513.00   | 520.88       | 541.25          | 7200        | 112,906   | <b>540.25</b>     | 7200        | 101,655   | <b>540.25</b> | 7200       | 59,259    | 539.51        |
| 200-3P-dD-1L-1 | 0.8           | 486.68   | 491.36       | 498.25          | 22          | 62        | 498.25            | <b>21</b>   | 53        | 498.25        | 28         | 68        | 498.25        |
| 200-3P-dD-1L-2 | 0.5           | 433.64   | 434.93       | 436.75          | <b>2</b>    | 10        | 436.75            | <b>2</b>    | 10        | 436.75        | <b>2</b>   | 10        | 436.75        |
| 200-3P-dD-1L-3 | 0.1           | 558.25   | 561.29       | 588.25          | 7200        | 12,999    | <b>582.25</b>     | 7200        | 11,459    | <b>582.25</b> | 7200       | 11,606    | 581.75        |
| 200-4P-dD-1L-1 | 1.4           | 482.31   | 488.12       | 503.75          | <b>338</b>  | 873       | 503.75            | 429         | 585       | 503.75        | 871        | 1817      | 503.75        |
| 200-4P-dD-1L-2 | 2.4           | 406.14   | 407.88       | 440.75          | 7200        | 5401      | <b>424.47</b>     | 7200        | 4927      | 424.31        | 7200       | 5857      | 424.25        |
| 200-4P-dD-1L-3 | 0.3           | 543.52   | 547.33       | 569.25          | 7200        | 17,152    | <b>564.01</b>     | 7200        | 12,315    | 564.00        | 7200       | 16,055    | 563.10        |
| 200-2P-oD-2L-1 | 0.6           | 390.62   | 394.73       | 404.75          | <b>136</b>  | 249       | 404.75            | 347         | 193       | 404.75        | 7200       | 12,808    | 403.53        |
| 200-2P-oD-2L-2 | 6.0           | 312.35   | 314.23       | 317.75          | 220         | 93        | 317.75            | 339         | 105       | 317.75        | <b>196</b> | 53        | 317.75        |
| 200-2P-oD-2L-3 | 0.1           | 460.50   | 460.62       | 479.75          | 7200        | 17,437    | 464.50            | 7200        | 25,653    | <b>464.75</b> | 7200       | 27,307    | 463.75        |
| 200-3P-oD-2L-1 | 5.2           | 395.30   | 398.33       | 411.75          | <b>6950</b> | 3915      | 411.75            | 7200        | 3802      | 411.15        | 7200       | 3998      | 410.00        |
| 200-3P-oD-2L-2 | 4.6           | 315.99   | 318.24       | 328.00          | 686         | 129       | 328.00            | 1588        | 442       | 328.00        | <b>431</b> | 89        | 328.00        |
| 200-3P-oD-2L-3 | 0.3           | 476.62   | 476.75       | 489.25          | 1703        | 360       | 489.25            | <b>628</b>  | 103       | 489.25        | 829        | 195       | 489.25        |
| 200-4P-oD-2L-1 | 1.9           | 399.14   | 403.23       | 443.50          | 7200        | 3493      | <b>416.25</b>     | 7200        | 2044      | 416.00        | 7200       | 3708      | 408.29        |
| 200-4P-oD-2L-2 | 7.7           | 319.66   | 321.88       | 336.50          | 4934        | 479       | 336.50            | <b>3207</b> | 595       | 336.50        | 7200       | 598       | 335.25        |
| 200-4P-oD-2L-3 | 1.8           | 458.04   | 461.14       | 510.75          | 7200        | 1377      | 480.75            | 7200        | 1970      | <b>481.00</b> | 7200       | 850       | 478.91        |
| 200-2P-dD-2L-1 | 0.7           | 442.40   | 444.61       | 453.25          | <b>592</b>  | 1262      | 453.25            | 3174        | 8926      | 453.25        | 7200       | 12,153    | 446.82        |
| 200-2P-dD-2L-2 | 0.8           | 382.52   | 383.05       | 412.00          | 7200        | 13,840    | 411.93            | <b>2387</b> | 4916      | 412.00        | 7200       | 13,621    | 401.28        |
| 200-2P-dD-2L-3 | 0.4           | 478.01   | 481.99       | 509.25          | <b>1808</b> | 3485      | 509.25            | 2727        | 3392      | 509.25        | 7200       | 9647      | 508.75        |
| 200-3P-dD-2L-1 | 6.2           | 463.06   | 466.94       | 489.00          | 7200        | 1981      | 485.36            | 7200        | 2572      | <b>486.00</b> | 7200       | 2517      | 482.16        |
| 200-3P-dD-2L-2 | 1.0           | 406.52   | 408.40       | 428.00          | 7200        | 1644      | 421.62            | 7200        | 1316      | <b>421.65</b> | 7200       | 3302      | 419.46        |
| 200-3P-dD-2L-3 | 0.2           | 530.12   | 530.25       | 538.50          | 7200        | 7818      | <b>537.50</b>     | 7200        | 5202      | <b>537.50</b> | 7200       | 5531      | <b>537.50</b> |
| 200-4P-dD-2L-1 | 2.4           | 449.60   | 453.44       | 477.75          | 7200        | 1065      | <b>467.21</b>     | 7200        | 866       | 467.06        | 7200       | 2894      | 463.50        |
| 200-4P-dD-2L-2 | 3.5           | 382.55   | 384.40       | 409.75          | 7200        | 1994      | <b>399.00</b>     | 7200        | 1209      | <b>399.00</b> | 7200       | 3168      | 398.50        |
| 200-4P-dD-2L-3 | 0.9           | 508.97   | 514.92       | 540.25          | 7200        | 678       | <b>532.23</b>     | 7200        | 726       | 531.57        | 7200       | 1997      | 531.75        |
| Average        | 1.65          |          |              |                 | <b>4134</b> | 6935      | # opt.: <b>19</b> | 4155        | 6665      | # opt.: 18    | 5161       | 6778      | # opt.: 11    |

**Table 12 Results for instances with 25 customers**

| Instance       | With GDT      |          |            | With GDT + Lift |             |         | Without GDT   |             |         |               |             |         |               |
|----------------|---------------|----------|------------|-----------------|-------------|---------|---------------|-------------|---------|---------------|-------------|---------|---------------|
|                | Root Time (s) | LP Bound | Root Bound | Best UB         | Time (s)    | # Nodes | End Bound     | Time (s)    | # Nodes | End Bound     | Time (s)    | # Nodes | End Bound     |
| 25O-2P-oD-1L-1 | 2.4           | 525.12   | 532.90     | 555.75          | 6162        | 14,627  | 555.75        | <b>5632</b> | 9378    | 555.75        | 7200        | 22,126  | 552.50        |
| 25O-2P-oD-1L-2 | 0.5           | 546.69   | 551.30     | 575.00          | 7200        | 39,182  | 569.86        | 7200        | 32,373  | <b>570.74</b> | 7200        | 32,173  | 568.03        |
| 25O-2P-oD-1L-3 | 1.6           | 567.17   | 570.16     | 595.25          | 7200        | 12,828  | 594.12        | 7200        | 11,694  | <b>594.25</b> | 7200        | 19,043  | 594.05        |
| 25O-3P-oD-1L-1 | 3.7           | 527.17   | 539.40     | 557.75          | 7200        | 12,179  | 557.75        | 7200        | 12,786  | 557.75        | 7200        | 308     | 557.75        |
| 25O-3P-oD-1L-2 | 0.9           | 548.69   | 558.31     | 586.50          | 7200        | 18,993  | <b>575.43</b> | 7200        | 19,169  | 571.10        | 7200        | 21,504  | 571.05        |
| 25O-3P-oD-1L-3 | 2.2           | 569.17   | 576.24     | 597.00          | 7200        | 14,224  | <b>596.92</b> | 7200        | 22,731  | 596.75        | 7200        | 16,058  | 596.75        |
| 25O-4P-oD-1L-1 | 3.8           | 529.12   | 532.23     | 597.00          | 7200        | 8136    | 554.48        | 7200        | 8024    | <b>556.33</b> | 7200        | 12,358  | 551.75        |
| 25O-4P-oD-1L-2 | 1.0           | 544.19   | 553.44     | 578.00          | 7200        | 19,336  | <b>571.17</b> | 7200        | 16,655  | 570.40        | 7200        | 19,363  | 569.00        |
| 25O-4P-oD-1L-3 | 2.8           | 572.17   | 574.22     | 604.25          | 7200        | 14,499  | 594.42        | 7200        | 14,441  | <b>599.62</b> | 7200        | 10,983  | 596.75        |
| 25O-2P-dD-1L-1 | 3.0           | 586.12   | 599.66     | 610.25          | 193         | 268     | 610.25        | 188         | 268     | 610.25        | <b>185</b>  | 268     | 610.25        |
| 25O-2P-dD-1L-2 | 0.6           | 600.19   | 612.50     | 628.50          | 2861        | 11,040  | 628.50        | 2760        | 11,040  | 628.50        | <b>2714</b> | 11,040  | 628.50        |
| 25O-2P-dD-1L-3 | 2.9           | 617.17   | 623.66     | 657.25          | 7200        | 11,831  | 645.85        | 7200        | 10,975  | <b>646.03</b> | 7200        | 11,686  | 643.39        |
| 25O-3P-dD-1L-1 | 6.1           | 590.12   | 609.53     | 622.00          | 6834        | 6053    | 622.00        | <b>6782</b> | 6053    | 622.00        | 7200        | 6959    | 621.75        |
| 25O-3P-dD-1L-2 | 1.0           | 618.43   | 624.88     | -               | 7200        | 14,535  | <b>639.64</b> | 7200        | 8769    | 639.03        | 7200        | 12,644  | 636.53        |
| 25O-3P-dD-1L-3 | 3.3           | 631.17   | 634.20     | 659.75          | 7200        | 11,386  | <b>656.50</b> | 7200        | 11,008  | 656.25        | 7200        | 14,984  | <b>656.50</b> |
| 25O-4P-dD-1L-1 | 6.7           | 589.41   | 599.89     | -               | 7200        | 4830    | <b>616.13</b> | 7200        | 5132    | 615.93        | 7200        | 5992    | 615.07        |
| 25O-4P-dD-1L-2 | 0.9           | 609.15   | 613.73     | -               | 7200        | 16,355  | <b>631.50</b> | 7200        | 12574   | <b>631.50</b> | 7200        | 15,206  | 624.40        |
| 25O-4P-dD-1L-3 | 1.6           | 626.67   | 628.36     | -               | 7200        | 10,851  | 647.82        | 7200        | 8361    | 648.30        | 7200        | 8714    | <b>650.25</b> |
| 25O-2P-oD-2L-1 | 3.1           | 472.88   | 473.67     | 500.00          | 7200        | 5013    | 497.75        | <b>1338</b> | 829     | 500.00        | 7200        | 3029    | 497.25        |
| 25O-2P-oD-2L-2 | 1.2           | 489.46   | 494.81     | 513.75          | 7200        | 10,171  | <b>508.00</b> | 7200        | 9190    | 507.61        | 7200        | 10,027  | 506.53        |
| 25O-2P-oD-2L-3 | 4.8           | 522.50   | 526.68     | 549.75          | 7200        | 8941    | 547.17        | <b>6390</b> | 7288    | 549.75        | 7200        | 10,038  | 547.26        |
| 25O-3P-oD-2L-1 | 6.0           | 484.47   | 485.27     | 514.25          | <b>6488</b> | 2995    | 514.25        | 7200        | 1691    | 512.25        | 7200        | 1034    | 510.50        |
| 25O-3P-oD-2L-2 | 20.0          | 497.69   | 502.34     | 536.25          | 7200        | 4346    | 522.22        | 7200        | 4465    | <b>522.93</b> | 7200        | 4061    | 515.99        |
| 25O-3P-oD-2L-3 | 11.4          | 530.95   | 533.80     | 555.50          | 7200        | 4234    | 549.41        | 7200        | 3341    | 549.50        | 7200        | 5220    | <b>555.48</b> |
| 25O-4P-oD-2L-1 | 2.4           | 484.38   | 485.17     | 607.00          | 7200        | 2611    | 509.25        | 7200        | 1113    | <b>512.50</b> | 7200        | 2827    | 508.81        |
| 25O-4P-oD-2L-2 | 4.0           | 496.77   | 500.40     | -               | 7200        | 2998    | 522.00        | 7200        | 4576    | <b>522.25</b> | 7200        | 4844    | 510.92        |
| 25O-4P-oD-2L-3 | 6.1           | 531.43   | 533.77     | 581.75          | 7200        | 3294    | 547.22        | 7200        | 2463    | 548.66        | 7200        | 6446    | <b>556.73</b> |
| 25O-2P-dD-2L-1 | 2.5           | 526.38   | 527.17     | 546.00          | 1307        | 566     | 546.00        | 635         | 362     | 546.00        | <b>222</b>  | 170     | 546.00        |
| 25O-2P-dD-2L-2 | 3.0           | 541.27   | 544.83     | -               | 7200        | 8707    | <b>559.13</b> | 7200        | 6110    | 558.75        | 7200        | 8025    | 554.68        |
| 25O-2P-dD-2L-3 | 4.7           | 572.57   | 575.26     | 595.00          | 3677        | 3434    | 595.00        | 3287        | 2793    | 595.00        | <b>1822</b> | 1745    | 595.00        |
| 25O-3P-dD-2L-1 | 3.7           | 542.67   | 543.47     | 563.00          | 1658        | 518     | 563.00        | 3217        | 623     | 563.00        | <b>350</b>  | 156     | 563.00        |
| 25O-3P-dD-2L-2 | 0.7           | 567.88   | 571.48     | 581.25          | 7200        | 3932    | 580.25        | 7200        | 2701    | <b>581.22</b> | 7200        | 5540    | 580.25        |
| 25O-3P-dD-2L-3 | 2.4           | 581.10   | 582.85     | 621.50          | 7200        | 4931    | 602.88        | 7200        | 5037    | 602.72        | 7200        | 2879    | <b>603.25</b> |
| 25O-4P-dD-2L-1 | 3.2           | 536.88   | 537.67     | 557.50          | 7030        | 2120    | 557.50        | <b>3853</b> | 771     | 557.50        | 7200        | 1861    | 557.50        |
| 25O-4P-dD-2L-2 | 1.4           | 553.88   | 557.48     | 580.25          | 7200        | 674     | <b>567.23</b> | 7200        | 784     | <b>567.23</b> | 7200        | 3692    | 566.25        |
| 25O-4P-dD-2L-3 | 2.6           | 581.10   | 582.86     | 616.00          | 7200        | 1262    | 590.36        | 7200        | 864     | 590.36        | 7200        | 4091    | <b>602.75</b> |
| Average        | 3.53          |          |            |                 | 6408        | 8654    | # opt.: 9     | <b>6147</b> | 7679    | # opt.: 10    | 6153        | 8780    | # opt.: 6     |

## Appendix C: Statistics on the Optimal Solutions

In Tables 13 to 17 (one table per number of orders), we report some statistics on the computed optimal solutions for the instances solved to optimality. When more than one optimal solution is available for an instance, we give the statistics of the solution obtained by the algorithm with the GDT branching. The reported statistics are the numbers of drivers, vehicles, production employees, workstations, and setups. In each table, the last row provides averages over all solved instances.

**Table 13 Statistics on the optimal solutions for instances with 15 customers**

| Instance       | #<br>Drivers | #<br>Vehicles | #<br>Employees | #<br>Workstations | #<br>Setups |
|----------------|--------------|---------------|----------------|-------------------|-------------|
| 15O-2P-oD-1L-1 | 4            | 3             | 3              | 2                 | 8           |
| 15O-2P-oD-1L-2 | 4            | 3             | 4              | 3                 | 7           |
| 15O-2P-oD-1L-3 | 4            | 4             | 1              | 1                 | 4           |
| 15O-3P-oD-1L-1 | 4            | 3             | 3              | 2                 | 9           |
| 15O-3P-oD-1L-3 | 4            | 4             | 1              | 1                 | 5           |
| 15O-4P-oD-1L-1 | 4            | 3             | 3              | 2                 | 9           |
| 15O-4P-oD-1L-3 | 4            | 4             | 1              | 1                 | 6           |
| 15O-2P-dD-1L-1 | 4            | 3             | 4              | 3                 | 8           |
| 15O-2P-dD-1L-3 | 4            | 4             | 2              | 2                 | 5           |
| 15O-3P-dD-1L-1 | 5            | 3             | 4              | 3                 | 10          |
| 15O-3P-dD-1L-2 | 6            | 5             | 4              | 3                 | 9           |
| 15O-3P-dD-1L-3 | 4            | 4             | 2              | 2                 | 6           |
| 15O-4P-dD-1L-1 | 5            | 3             | 4              | 3                 | 10          |
| 15O-4P-dD-1L-3 | 4            | 4             | 2              | 2                 | 6           |
| 15O-2P-oD-2L-1 | 4            | 3             | 2              | 1                 | 5           |
| 15O-2P-oD-2L-2 | 4            | 3             | 2              | 2                 | 6           |
| 15O-2P-oD-2L-3 | 4            | 4             | 1              | 1                 | 3           |
| 15O-3P-oD-2L-1 | 4            | 3             | 2              | 1                 | 7           |
| 15O-3P-oD-2L-2 | 5            | 3             | 3              | 2                 | 7           |
| 15O-3P-oD-2L-3 | 4            | 4             | 1              | 1                 | 4           |
| 15O-4P-oD-2L-1 | 4            | 3             | 2              | 1                 | 7           |
| 15O-4P-oD-2L-2 | 4            | 3             | 2              | 2                 | 7           |
| 15O-4P-oD-2L-3 | 4            | 4             | 1              | 1                 | 5           |
| 15O-2P-dD-2L-1 | 4            | 3             | 3              | 2                 | 6           |
| 15O-2P-dD-2L-3 | 4            | 4             | 1              | 1                 | 4           |
| 15O-3P-dD-2L-1 | 5            | 3             | 3              | 2                 | 7           |
| 15O-3P-dD-2L-3 | 4            | 4             | 2              | 2                 | 5           |
| 15O-4P-dD-2L-1 | 5            | 3             | 3              | 2                 | 9           |
| Average        | 4.25         | 3.46          | 2.36           | 1.82              | 6.57        |

**Table 14** Statistics on the optimal solutions for instances with 20 customers

| Instance       | #<br>Drivers | #<br>Vehicles | #<br>Employees | #<br>Workstations | #<br>Setups |
|----------------|--------------|---------------|----------------|-------------------|-------------|
| 20O-2P-oD-1L-1 | 4            | 3             | 2              | 1                 | 5           |
| 20O-2P-oD-1L-3 | 5            | 4             | 2              | 1                 | 6           |
| 20O-3P-oD-1L-1 | 4            | 3             | 3              | 2                 | 7           |
| 20O-3P-oD-1L-2 | 4            | 3             | 2              | 1                 | 8           |
| 20O-4P-oD-1L-1 | 4            | 3             | 3              | 2                 | 8           |
| 20O-4P-oD-1L-2 | 3            | 2             | 3              | 2                 | 8           |
| 20O-2P-dD-1L-1 | 4            | 3             | 3              | 2                 | 6           |
| 20O-2P-dD-1L-2 | 5            | 4             | 3              | 2                 | 6           |
| 20O-3P-dD-1L-1 | 5            | 4             | 3              | 2                 | 8           |
| 20O-3P-dD-1L-2 | 5            | 4             | 3              | 2                 | 6           |
| 20O-4P-dD-1L-1 | 4            | 3             | 4              | 3                 | 9           |
| 20O-2P-oD-2L-1 | 4            | 3             | 2              | 1                 | 5           |
| 20O-2P-oD-2L-2 | 3            | 2             | 2              | 1                 | 4           |
| 20O-3P-oD-2L-1 | 4            | 3             | 2              | 1                 | 7           |
| 20O-3P-oD-2L-2 | 4            | 3             | 2              | 1                 | 7           |
| 20O-4P-oD-2L-2 | 3            | 2             | 2              | 1                 | 7           |
| 20O-3P-oD-2L-3 | 5            | 4             | 2              | 1                 | 7           |
| 20O-2P-dD-2L-1 | 4            | 3             | 3              | 2                 | 5           |
| 20O-2P-dD-2L-2 | 5            | 4             | 3              | 2                 | 5           |
| 20O-2P-dD-2L-3 | 5            | 4             | 2              | 1                 | 5           |
| Average        | 4.25         | 3.20          | 2.55           | 1.55              | 6.45        |

**Table 15** Statistics on the optimal solutions for instances with 25 customers

| Instance       | #<br>Drivers | #<br>Vehicles | #<br>Employees | #<br>Workstations | #<br>Setups |
|----------------|--------------|---------------|----------------|-------------------|-------------|
| 25O-2P-oD-1L-1 | 6            | 5             | 3              | 2                 | 8           |
| 25O-3P-oD-1L-1 | 6            | 5             | 3              | 2                 | 10          |
| 25O-2P-dD-1L-1 | 6            | 5             | 4              | 3                 | 9           |
| 25O-2P-dD-1L-2 | 6            | 5             | 4              | 3                 | 9           |
| 25O-3P-dD-1L-1 | 6            | 5             | 4              | 3                 | 11          |
| 25O-2P-oD-2L-1 | 6            | 5             | 2              | 1                 | 5           |
| 25O-2P-oD-2L-3 | 7            | 6             | 2              | 1                 | 6           |
| 25O-3P-oD-2L-1 | 6            | 5             | 2              | 1                 | 7           |
| 25O-2P-dD-2L-1 | 6            | 5             | 3              | 2                 | 6           |
| 25O-2P-dD-2L-3 | 7            | 6             | 2              | 2                 | 6           |
| 25O-3P-dD-2L-1 | 6            | 5             | 3              | 2                 | 8           |
| 25O-4P-dD-2L-1 | 6            | 5             | 3              | 2                 | 10          |
| Average        | 6.17         | 5.17          | 2.92           | 2.00              | 7.92        |

**Table 16** Statistics on the optimal solutions for instances with 30 customers

| Instance       | #<br>Drivers | #<br>Vehicles | #<br>Employees | #<br>Workstations | #<br>Setups |
|----------------|--------------|---------------|----------------|-------------------|-------------|
| 30O-3P-dD-1L-1 | 9            | 7             | 5              | 4                 | 12          |
| 30O-3P-dD-2L-1 | 8            | 7             | 3              | 3                 | 5           |
| Average        | 9.50         | 7.00          | 4.00           | 3.50              | 8.50        |

**Table 17** Statistics on the optimal solutions for instances with 40 customers

| Instance       | #<br>Drivers | #<br>Vehicles | #<br>Employees | #<br>Workstations | #<br>Setups |
|----------------|--------------|---------------|----------------|-------------------|-------------|
| 40O-2P-oD-2L-3 | 8            | 7             | 2              | 2                 | 7           |
| 40O-2P-dD-2L-2 | 7            | 7             | 4              | 4                 | 5           |
| Average        | 7.50         | 7.00          | 3.00           | 3.00              | 6.00        |

## Appendix D: Detailed Results for the Matheuristics

In this appendix, we report the results obtained by the three matheuristics SEQ\_H, E\_SEQ\_H, and INT\_H for each of the 108 tested instances with 30, 40 or 50 customers. These results are given in Tables 18–20. In these tables, we indicate for each instance the lower bounds obtained by the exact branch-price-and-cut algorithm at the root node before adding cuts (LP) and at the end of the solution process (End). Optimality was reached only for two instances with 30 customers and two instances with 40 customers: the end lower bounds of these instances are highlighted in bold. For all other instances, the solution process stopped at the 14,400-second time limit. Then for each matheuristic, we report the total time in seconds (split by phase for the sequential heuristics, where VR stands for vehicle routing phase and Prod for production phase), the number of extra workstations/employees required (xWE), the cost of the best solution found (UB), and the gap in percentage between this cost and the end lower bound yielded by the exact algorithm. At the bottom of each table, a row indicates averages as well as the total number of instances solved to optimality by the exact algorithm.

Table 18 Results for instances with 30 customers

| Instance       | Exact       |               | SEQ_H    |       |      |        |         | E_SEQ_H  |       |      |        |         | INT_H    |      |        |         |
|----------------|-------------|---------------|----------|-------|------|--------|---------|----------|-------|------|--------|---------|----------|------|--------|---------|
|                | Lower bound |               | Time (s) |       |      |        |         | Time (s) |       |      |        |         | Time (s) | xWE  | UB     | Gap (%) |
|                | LP          | End           | VR       | Prod  | xWE  | UB     | Gap (%) | VR       | Prod  | xWE  | UB     | Gap (%) |          |      |        |         |
| 30O-2P-oD-1L-1 | 594.76      | 631.27        | 27       | 1     | 0    | 665.25 | 5.38    | 41       | 42    | 0    | 648.25 | 2.69    | 660      | 0    | 655.50 | 3.84    |
| 30O-2P-oD-1L-2 | 607.38      | 634.75        | 72       | 2     | 0    | 670.50 | 5.63    | 31       | 17    | 0    | 660.00 | 3.98    | 53       | 0    | 664.75 | 4.73    |
| 30O-2P-oD-1L-3 | 599.06      | 651.50        | 1        | 19    | 0    | 701.75 | 7.71    | 51       | 21    | 0    | 673.25 | 3.34    | 133      | 0    | 670.75 | 2.95    |
| 30O-3P-oD-1L-1 | 624.59      | 657.75        | 58       | 1852  | 1    | 746.00 | 13.42   | 15       | 123   | 0    | 687.00 | 4.45    | 434      | 0    | 680.25 | 3.42    |
| 30O-3P-oD-1L-2 | 650.88      | 691.57        | 89       | 291   | 0    | 754.75 | 9.14    | 55       | 104   | 0    | 721.50 | 4.33    | 268      | 0    | 716.75 | 3.64    |
| 30O-3P-oD-1L-3 | 615.52      | 663.77        | 1        | 343   | 1    | 720.75 | 8.58    | 29       | 177   | 0    | 727.25 | 9.56    | 296      | 0    | 687.75 | 3.61    |
| 30O-4P-oD-1L-1 | 620.38      | 655.77        | 11       | 1986  | 1    | 719.25 | 9.68    | 117      | 296   | 0    | 709.25 | 8.16    | 661      | 0    | 689.50 | 5.14    |
| 30O-4P-oD-1L-2 | 644.78      | 680.85        | 75       | 308   | 0    | 749.75 | 10.12   | 115      | 530   | 0    | 733.25 | 7.70    | 6803     | 0    | 741.50 | 8.91    |
| 30O-4P-oD-1L-3 | 607.75      | 653.49        | 1        | 1071  | 1    | 754.75 | 15.50   | 41       | 227   | 0    | 722.75 | 10.60   | 3741     | 0    | 717.00 | 9.72    |
| 30O-2P-dD-1L-1 | 788.47      | 810.75        | 10       | 4     | 2    | 861.00 | 6.20    | 41       | 10    | 1    | 826.00 | 1.88    | 47       | 0    | 821.25 | 1.30    |
| 30O-2P-dD-1L-2 | 749.76      | 779.75        | 1        | 3     | 2    | 824.75 | 5.77    | 22       | 47    | 1    | 805.25 | 3.27    | 84       | 0    | 829.25 | 6.35    |
| 30O-2P-dD-1L-3 | 728.92      | 778.00        | 37       | 52    | 3    | 913.25 | 17.38   | 33       | 10    | 0    | 820.25 | 5.43    | 83       | 0    | 792.25 | 1.83    |
| 30O-3P-dD-1L-1 | 849.75      | <b>864.50</b> | 15       | 308   | 1    | 934.75 | 8.13    | 50       | 9     | 0    | 864.50 | 0.00    | 53       | 0    | 864.50 | 0.00    |
| 30O-3P-dD-1L-2 | 859.56      | 913.27        | 4        | 495   | 3    | 970.00 | 6.21    | 154      | 129   | 1    | 948.50 | 3.86    | 211      | 0    | 948.00 | 3.80    |
| 30O-3P-dD-1L-3 | 766.55      | 800.27        | 34       | 191   | 1    | 915.75 | 14.43   | 76       | 202   | 0    | 839.00 | 4.84    | 223      | 0    | 813.00 | 1.59    |
| 30O-4P-dD-1L-1 | 868.54      | 883.41        | 380      | 71    | 0    | 908.00 | 2.78    | 2682     | 29    | 0    | 891.25 | 0.89    | 543      | 0    | 906.25 | 2.59    |
| 30O-4P-dD-1L-2 | 849.03      | 888.82        | 23       | 1109  | 1    | 916.00 | 3.06    | 13       | 117   | 1    | 901.00 | 1.37    | 1703     | 0    | 912.25 | 2.64    |
| 30O-4P-dD-1L-3 | 758.80      | 794.60        | 6        | 57    | 1    | 865.50 | 8.92    | 59       | 67    | 1    | 815.50 | 2.63    | 582      | 0    | 823.50 | 3.64    |
| 30O-2P-oD-2L-1 | 555.12      | 582.88        | 83       | 50    | 0    | 594.25 | 1.95    | 155      | 12    | 0    | 583.75 | 0.15    | 277      | 0    | 583.75 | 0.15    |
| 30O-2P-oD-2L-2 | 565.75      | 589.88        | 25       | 56    | 0    | 606.50 | 2.82    | 318      | 83    | 0    | 620.50 | 5.19    | 205      | 0    | 605.25 | 2.61    |
| 30O-2P-oD-2L-3 | 549.60      | 584.25        | 1        | 170   | 0    | 601.00 | 2.87    | 6        | 86    | 0    | 617.25 | 5.65    | 259      | 0    | 592.75 | 1.45    |
| 30O-3P-oD-2L-1 | 581.13      | 601.61        | 16       | 375   | 0    | 630.75 | 4.84    | 47       | 605   | 0    | 628.75 | 4.51    | 2252     | 0    | 625.25 | 3.93    |
| 30O-3P-oD-2L-2 | 604.44      | 631.31        | 206      | 251   | 1    | 717.75 | 13.69   | 617      | 728   | 0    | 669.50 | 6.05    | 1541     | 0    | 666.25 | 5.53    |
| 30O-3P-oD-2L-3 | 567.00      | 601.00        | 1        | 285   | 0    | 609.50 | 1.41    | 9        | 1003  | 0    | 624.75 | 3.95    | 2286     | 0    | 626.50 | 4.24    |
| 30O-4P-oD-2L-1 | 578.52      | 601.70        | 22       | 588   | 0    | 627.25 | 4.25    | 78       | 350   | 0    | 626.25 | 4.08    | 1751     | 0    | 628.25 | 4.41    |
| 30O-4P-oD-2L-2 | 604.44      | 625.29        | 128      | 1666  | 0    | 671.25 | 7.35    | 1691     | 1070  | 0    | 667.50 | 6.75    | 1375     | 0    | 662.00 | 5.87    |
| 30O-4P-oD-2L-3 | 562.77      | 598.33        | 1        | 936   | 0    | 634.00 | 5.96    | 14       | 671   | 0    | 624.75 | 4.42    | 1930     | 0    | 639.25 | 6.84    |
| 30O-2P-dD-2L-1 | 737.01      | 748.50        | 9        | 20    | 0    | 758.50 | 1.34    | 83       | 14    | 0    | 753.00 | 0.60    | 161      | 0    | 755.50 | 0.94    |
| 30O-2P-dD-2L-2 | 691.35      | 712.54        | 54       | 4     | 0    | 722.75 | 1.43    | 176      | 9     | 0    | 728.25 | 2.20    | 584      | 0    | 720.50 | 1.12    |
| 30O-2P-dD-2L-3 | 670.54      | 707.39        | 78       | 11    | 0    | 733.75 | 3.73    | 242      | 52    | 0    | 723.75 | 2.31    | 1000     | 0    | 736.75 | 4.15    |
| 30O-3P-dD-2L-1 | 811.60      | <b>827.25</b> | 57       | 695   | 0    | 842.25 | 1.81    | 321      | 2     | 0    | 827.50 | 0.03    | 905      | 0    | 835.75 | 1.03    |
| 30O-3P-dD-2L-2 | 792.38      | 802.43        | 13       | 3666  | 0    | 842.50 | 4.99    | 102      | 1421  | 0    | 833.25 | 3.84    | 2359     | 0    | 821.25 | 2.35    |
| 30O-3P-dD-2L-3 | 715.76      | 741.40        | 27       | 864   | 0    | 768.50 | 3.66    | 342      | 1664  | 0    | 777.50 | 4.87    | 6840     | 0    | 768.00 | 3.59    |
| 30O-4P-dD-2L-1 | 824.65      | 845.05        | 367      | 336   | 0    | 856.00 | 1.30    | 5132     | 1     | 0    | 846.75 | 0.20    | 9660     | 0    | 855.50 | 1.24    |
| 30O-4P-dD-2L-2 | 802.99      | 814.38        | 46       | 1272  | 0    | 855.25 | 5.02    | 580      | 1292  | 0    | 855.25 | 5.02    | 3375     | 0    | 859.50 | 5.54    |
| 30O-4P-dD-2L-3 | 709.16      | 739.22        | 26       | 633   | 0    | 790.00 | 6.87    | 419      | 1229  | 0    | 795.75 | 7.65    | 1425     | 0    | 770.25 | 4.20    |
| Average        |             | # opt.: 2     | 55.7     | 556.7 | 0.53 | 762.6  | 6.5     | 387.7    | 345.8 | 0.14 | 744.38 | 4.1     | 1521.2   | 0.00 | 741.28 | 3.6     |

**Table 19 Results for instances with 40 customers**

| Instance       | Exact       |               | SEQ_H    |        |      |         |         | E_SEQ_H  |       |      |         |         | INT_H    |      |         |         |
|----------------|-------------|---------------|----------|--------|------|---------|---------|----------|-------|------|---------|---------|----------|------|---------|---------|
|                | Lower bound |               | Time (s) |        |      |         |         | Time (s) |       |      |         |         | Time (s) | xWE  | UB      | Gap (%) |
|                | LP          | End           | VR       | Prod   | xWE  | UB      | Gap (%) | VR       | Prod  | xWE  | UB      | Gap (%) |          |      |         |         |
| 40O-2P-oD-1L-1 | 770.30      | 806.00        | 116      | 867    | 2    | 942.00  | 16.87   | 316      | 38    | 0    | 857.00  | 6.33    | 255      | 0    | 821.25  | 1.89    |
| 40O-2P-oD-1L-2 | 746.81      | 766.62        | 156      | 30     | 1    | 820.75  | 7.06    | 29       | 901   | 1    | 823.25  | 7.39    | 398      | 0    | 775.75  | 1.19    |
| 40O-2P-oD-1L-3 | 758.65      | 819.11        | 31       | 121    | 2    | 903.00  | 10.24   | 112      | 8     | 0    | 828.00  | 1.09    | 115      | 0    | 829.25  | 1.24    |
| 40O-3P-oD-1L-1 | 799.83      | 826.12        | 55       | 191    | 2    | 955.50  | 15.66   | 203      | 816   | 1    | 917.50  | 11.06   | 473      | 0    | 887.75  | 7.46    |
| 40O-3P-oD-1L-2 | 787.57      | 815.29        | 65       | 718    | 1    | 927.75  | 13.79   | 49       | 773   | 1    | 869.75  | 6.68    | 405      | 1    | 861.00  | 5.61    |
| 40O-3P-oD-1L-3 | 777.10      | 832.89        | 17       | 1095   | 2    | 910.00  | 9.26    | 248      | 340   | 1    | 875.00  | 5.06    | 603      | 1    | 871.00  | 4.58    |
| 40O-4P-oD-1L-1 | 784.15      | 817.70        | 121      | 1083   | 1    | 933.50  | 14.16   | 456      | 918   | 0    | 918.75  | 12.36   | 1078     | 1    | 883.50  | 8.05    |
| 40O-4P-oD-1L-2 | 777.41      | 805.67        | 66       | 661    | 1    | 879.75  | 9.19    | 170      | 6039  | 1    | 892.50  | 10.78   | 279      | 0    | 1005.00 | 24.74   |
| 40O-4P-oD-1L-3 | 764.08      | 818.60        | 10       | 3630   | 1    | 931.50  | 13.79   | 442      | 276   | 1    | 883.50  | 7.93    | 298      | 0    | 908.25  | 10.95   |
| 40O-2P-dD-1L-1 | 1022.12     | 1036.84       | 33       | 1      | 8    | 1395.75 | 34.62   | 44       | 6     | 0    | 1069.75 | 3.17    | 145      | 0    | 1053.00 | 1.56    |
| 40O-2P-dD-1L-2 | 915.15      | 943.47        | 3        | 12     | 2    | 1009.00 | 6.95    | 209      | 50    | 1    | 982.75  | 4.16    | 261      | 1    | 984.00  | 4.30    |
| 40O-2P-dD-1L-3 | 971.28      | 999.27        | 126      | 16     | 4    | 1162.00 | 16.28   | 98       | 99    | 1    | 1033.75 | 3.45    | 183      | 1    | 1024.00 | 2.47    |
| 40O-3P-dD-1L-1 | 1096.49     | 1115.88       | 65       | 29     | 1    | 1215.00 | 8.88    | 336      | 39    | 0    | 1146.75 | 2.77    | 485      | 0    | 1176.00 | 5.39    |
| 40O-3P-dD-1L-2 | 1042.41     | 1090.62       | 59       | 295    | 2    | 1141.25 | 4.64    | 443      | 977   | 1    | 1144.50 | 4.94    | 764      | 2    | 1136.25 | 4.18    |
| 40O-3P-dD-1L-3 | 1021.32     | 1044.30       | 117      | 6583   | 2    | 1240.50 | 18.79   | 78       | 539   | 0    | 1097.75 | 5.12    | 382      | 0    | 1071.50 | 2.60    |
| 40O-4P-dD-1L-1 | 1114.14     | 1138.17       | 69       | 167    | 2    | 1320.75 | 16.04   | 921      | 87    | 0    | 1241.50 | 9.08    | 869      | 0    | 1199.25 | 5.37    |
| 40O-4P-dD-1L-2 | 1029.34     | 1055.28       | 52       | 3582   | 2    | 1195.50 | 13.29   | 144      | 1968  | 1    | 1135.75 | 7.63    | 1266     | 1    | 1127.75 | 6.87    |
| 40O-4P-dD-1L-3 | 764.08      | 818.38        | 10       | 14400  | 0    | 932.50  | 13.94   | 288      | 3716  | 0    | 922.00  | 12.66   | 5414     | 0    | 880.50  | 7.59    |
| 40O-2P-oD-1L-1 | 713.20      | 731.00        | 309      | 55     | 0    | 787.25  | 7.69    | 906      | 43    | 0    | 764.00  | 4.51    | 174      | 0    | 760.00  | 3.97    |
| 40O-2P-oD-1L-2 | 695.96      | 714.69        | 772      | 42     | 0    | 738.00  | 3.26    | 923      | 112   | 0    | 748.50  | 4.73    | 944      | 0    | 745.75  | 4.35    |
| 40O-2P-oD-1L-3 | 700.90      | <b>747.50</b> | 22       | 27     | 0    | 763.00  | 2.07    | 31       | 122   | 0    | 770.00  | 3.01    | 177      | 0    | 762.50  | 2.01    |
| 40O-3P-oD-1L-1 | 742.26      | 760.06        | 338      | 156    | 1    | 836.00  | 9.99    | 755      | 39    | 0    | 789.75  | 3.91    | 3421     | 0    | 828.00  | 8.94    |
| 40O-3P-oD-1L-2 | 739.98      | 759.84        | 92       | 830    | 0    | 790.25  | 4.00    | 235      | 686   | 0    | 787.25  | 3.61    | 1057     | 0    | 780.50  | 2.72    |
| 40O-3P-oD-1L-3 | 719.66      | 767.48        | 29       | 136    | 0    | 802.50  | 4.56    | 98       | 1252  | 0    | 807.50  | 5.21    | 1337     | 0    | 821.50  | 7.04    |
| 40O-4P-oD-1L-1 | 735.32      | 752.87        | 972      | 353    | 0    | 792.25  | 5.23    | 1172     | 6382  | 0    | 866.25  | 15.06   | 3293     | 0    | 837.75  | 11.27   |
| 40O-4P-oD-1L-2 | 733.48      | 752.50        | 88       | 3011   | 0    | 792.75  | 5.35    | 478      | 782   | 0    | 795.75  | 5.75    | 1529     | 0    | 830.50  | 10.37   |
| 40O-4P-oD-1L-3 | 713.94      | 757.50        | 28       | 933    | 0    | 831.00  | 9.70    | 224      | 837   | 0    | 797.25  | 5.25    | 1402     | 0    | 827.25  | 9.21    |
| 40O-2P-dD-1L-1 | 966.58      | 979.50        | 83       | 59     | 0    | 991.00  | 1.17    | 128      | 5     | 0    | 980.50  | 0.10    | 542      | 0    | 999.50  | 2.04    |
| 40O-2P-dD-1L-2 | 856.14      | <b>859.00</b> | 16       | 93     | 0    | 881.50  | 2.62    | 35       | 18    | 0    | 867.50  | 0.99    | 348      | 0    | 879.00  | 2.33    |
| 40O-2P-dD-1L-3 | 916.67      | 936.76        | 305      | 70     | 0    | 953.50  | 1.79    | 668      | 66    | 0    | 951.00  | 1.52    | 384      | 0    | 938.25  | 0.16    |
| 40O-3P-dD-1L-1 | 1055.81     | 1068.71       | 242      | 194    | 0    | 1080.00 | 1.06    | 656      | 8     | 0    | 1071.50 | 0.26    | 1170     | 0    | 1083.75 | 1.41    |
| 40O-3P-dD-1L-2 | 977.36      | 988.49        | 418      | 719    | 0    | 1031.25 | 4.33    | 1806     | 632   | 0    | 1062.25 | 7.46    | 3370     | 0    | 1033.75 | 4.58    |
| 40O-3P-dD-1L-3 | 974.52      | 988.60        | 140      | 124    | 0    | 1028.50 | 4.04    | 483      | 600   | 0    | 1034.50 | 4.64    | 2842     | 0    | 1132.75 | 14.58   |
| 40O-4P-dD-1L-1 | 1080.50     | 1096.69       | 302      | 426    | 0    | 1154.25 | 5.25    | 1273     | 2218  | 0    | 1153.50 | 5.18    | 1800     | 0    | 1182.25 | 7.80    |
| 40O-4P-dD-1L-2 | 979.90      | 987.31        | 47       | 623    | 0    | 1050.75 | 6.43    | 234      | 2468  | 0    | 1035.00 | 4.83    | 2727     | 0    | 1071.25 | 8.50    |
| 40O-4P-dD-1L-3 | 713.94      | 754.28        | 50       | 1378   | 0    | 810.00  | 7.39    | 181      | 1599  | 0    | 795.75  | 5.50    | 807      | 0    | 795.75  | 5.50    |
| Average        |             | # opt.: 2     | 150.7    | 1186.4 | 1.03 | 970.27  | 9.1     | 413.1    | 985.0 | 0.28 | 936.60  | 5.6     | 1138.8   | 0.22 | 939.03  | 5.9     |

**Table 20 Results for instances with 50 customers**

| Instance       | Exact       |           | SEQ_H    |        |      |         |         | E_SEQ_H  |        |      |         |         | INT_H    |      |         |         |
|----------------|-------------|-----------|----------|--------|------|---------|---------|----------|--------|------|---------|---------|----------|------|---------|---------|
|                | Lower bound |           | Time (s) |        |      |         |         | Time (s) |        |      |         |         | Time (s) | xWE  | UB      | Gap (%) |
|                | LP          | End       | VR       | Prod   | xWE  | UB      | Gap (%) | VR       | Prod   | xWE  | UB      | Gap (%) |          |      |         |         |
| 50O-2P-oD-1L-1 | 921.72      | 957.60    | 3        | 2      | 2    | 1044.25 | 9.05    | 796      | 1      | 0    | 978.50  | 2.18    | 425      | 0    | 1003.50 | 4.79    |
| 50O-2P-oD-1L-2 | 859.14      | 891.82    | 721      | 31     | 2    | 999.50  | 12.07   | 2233     | 31     | 0    | 930.00  | 4.28    | 2092     | 0    | 940.50  | 5.46    |
| 50O-2P-oD-1L-3 | 905.39      | 946.53    | 54       | 36     | 2    | 1036.75 | 9.53    | 685      | 85     | 0    | 994.75  | 5.09    | 255      | 0    | 996.00  | 5.23    |
| 50O-3P-oD-1L-1 | 936.19      | 966.87    | 13       | 7      | 2    | 1080.75 | 11.78   | 900      | 286    | 0    | 1043.50 | 7.93    | 571      | 0    | 1015.00 | 4.98    |
| 50O-3P-oD-1L-2 | 900.84      | 928.55    | 486      | 1818   | 1    | 1036.50 | 11.63   | 391      | 6478   | 1    | 1000.25 | 7.72    | 682      | 1    | 1017.50 | 9.58    |
| 50O-3P-oD-1L-3 | 930.80      | 968.50    | 202      | 13     | 1    | 1039.00 | 7.28    | 566      | 222    | 1    | 1025.75 | 5.91    | 802      | 0    | 1028.25 | 6.17    |
| 50O-4P-oD-1L-1 | 923.51      | 953.53    | 2        | 1112   | 2    | 1077.25 | 12.97   | 1419     | 677    | 0    | 1037.00 | 8.75    | 1085     | 0    | 1031.00 | 8.12    |
| 50O-4P-oD-1L-2 | 891.91      | 914.06    | 444      | 13055  | 1    | 1027.00 | 12.36   | 243      | 1358   | 0    | 1049.75 | 14.84   | 11013    | 1    | 1021.00 | 11.70   |
| 50O-4P-oD-1L-3 | 922.30      | 955.72    | 186      | 2842   | 1    | 1093.50 | 14.42   | 550      | 568    | 0    | 1038.75 | 8.69    | 2389     | 0    | 1045.75 | 9.42    |
| 50O-2P-dD-1L-1 | 1197.18     | 1219.31   | 312      | 4      | 5    | 1470.25 | 20.58   | 985      | 96     | 1    | 1268.50 | 4.03    | 539      | 0    | 1294.25 | 6.15    |
| 50O-2P-dD-1L-2 | 1069.47     | 1093.82   | 131      | 540    | 5    | 1296.50 | 18.53   | 594      | 62     | 1    | 1129.75 | 3.28    | 426      | 0    | 1131.00 | 3.40    |
| 50O-2P-dD-1L-3 | 1123.12     | 1185.19   | 471      | 328    | 5    | 1376.50 | 16.14   | 1736     | 35     | 0    | 1269.75 | 7.13    | 2295     | 1    | 1429.75 | 20.63   |
| 50O-3P-dD-1L-1 | 1277.81     | 1311.71   | 200      | 835    | 3    | 1435.75 | 9.46    | 143      | 65     | 1    | 1398.25 | 6.60    | 1507     | 1    | 1335.25 | 1.79    |
| 50O-3P-dD-1L-2 | 1206.15     | 1247.01   | 348      | 789    | 5    | 1429.75 | 14.65   | 411      | 2615   | 1    | 1296.25 | 3.95    | 807      | 1    | 1321.25 | 5.95    |
| 50O-3P-dD-1L-3 | 1208.99     | 1238.06   | 131      | 12497  | 4    | 1449.25 | 17.06   | 817      | 4823   | 1    | 1345.50 | 8.68    | 1188     | 1    | 1462.00 | 18.09   |
| 50O-4P-dD-1L-1 | 1291.80     | 1311.39   | 288      | 1651   | 1    | 1475.50 | 12.51   | 779      | 6560   | 0    | 1464.00 | 11.64   | 1473     | 1    | 1393.00 | 6.22    |
| 50O-4P-dD-1L-2 | 1193.36     | 1211.22   | 181      | 5612   | 3    | 1357.50 | 12.08   | 704      | 10412  | 0    | 1327.00 | 9.56    | 3348     | 1    | 1322.25 | 9.17    |
| 50O-4P-dD-1L-3 | 1200.85     | 1227.65   | 23       | 14400  | 3    | 1388.00 | 13.06   | 1674     | 4575   | 1    | 1308.00 | 6.55    | 2162     | 1    | 1313.50 | 6.99    |
| 50O-2P-oD-2L-1 | 865.78      | 875.50    | 48       | 160    | 0    | 904.75  | 3.34    | 123      | 14     | 0    | 898.25  | 2.60    | 460      | 0    | 893.25  | 2.03    |
| 50O-2P-oD-2L-2 | 806.46      | 822.00    | 22       | 47     | 0    | 839.75  | 2.16    | 882      | 12     | 0    | 843.00  | 2.55    | 337      | 0    | 841.50  | 2.37    |
| 50O-2P-oD-2L-3 | 825.25      | 853.83    | 32       | 201    | 0    | 892.25  | 4.50    | 105      | 138    | 0    | 901.75  | 5.61    | 477      | 0    | 896.75  | 5.03    |
| 50O-3P-oD-2L-1 | 883.78      | 886.81    | 23       | 1088   | 0    | 947.25  | 6.82    | 124      | 661    | 0    | 938.75  | 5.86    | 2336     | 0    | 935.25  | 5.46    |
| 50O-3P-oD-2L-2 | 858.08      | 865.25    | 43       | 656    | 0    | 897.50  | 3.73    | 48       | 667    | 0    | 920.00  | 6.33    | 1103     | 0    | 882.25  | 1.96    |
| 50O-3P-oD-2L-3 | 860.94      | 891.77    | 84       | 960    | 0    | 955.75  | 7.17    | 365      | 1801   | 0    | 955.75  | 7.17    | 2347     | 0    | 948.75  | 6.39    |
| 50O-4P-oD-2L-1 | 877.43      | 886.60    | 26       | 2142   | 0    | 965.25  | 8.87    | 150      | 2599   | 0    | 976.25  | 10.11   | 2635     | 0    | 936.25  | 5.60    |
| 50O-4P-oD-2L-2 | 852.08      | 860.00    | 43       | 1101   | 0    | 905.00  | 5.23    | 57       | 362    | 0    | 916.50  | 6.57    | 1979     | 0    | 912.50  | 6.10    |
| 50O-4P-oD-2L-3 | 845.94      | 872.75    | 125      | 4191   | 0    | 984.75  | 12.83   | 355      | 10703  | 0    | 948.25  | 8.65    | 2855     | 0    | 951.75  | 9.05    |
| 50O-2P-dD-2L-1 | 1142.94     | 1154.12   | 851      | 72     | 0    | 1189.25 | 3.04    | 1141     | 42     | 0    | 1175.25 | 1.83    | 1170     | 0    | 1170.00 | 1.38    |
| 50O-2P-dD-2L-2 | 1011.76     | 1021.52   | 153      | 24     | 0    | 1044.50 | 2.25    | 364      | 55     | 0    | 1038.50 | 1.66    | 636      | 0    | 1065.00 | 4.26    |
| 50O-2P-dD-2L-3 | 1065.33     | 1091.95   | 854      | 198    | 0    | 1125.25 | 3.05    | 1896     | 89     | 0    | 1111.75 | 1.81    | 1821     | 0    | 1169.75 | 7.12    |
| 50O-3P-dD-2L-1 | 1220.72     | 1226.75   | 288      | 1018   | 0    | 1247.25 | 1.67    | 1307     | 422    | 0    | 1242.00 | 1.24    | 2041     | 0    | 1241.50 | 1.20    |
| 50O-3P-dD-2L-2 | 1150.83     | 1161.39   | 578      | 932    | 0    | 1221.25 | 5.15    | 775      | 638    | 0    | 1195.75 | 2.96    | 9734     | 0    | 1221.25 | 5.15    |
| 50O-3P-dD-2L-3 | 1158.47     | 1183.21   | 308      | 2903   | 0    | 1216.50 | 2.81    | 1018     | 263    | 0    | 1205.75 | 1.90    | 14311    | 0    | 1274.00 | 7.67    |
| 50O-4P-dD-2L-1 | 1255.67     | 1264.09   | 816      | 6406   | 0    | 1327.00 | 4.98    | 2504     | 2761   | 0    | 1327.00 | 4.98    | 2499     | 0    | 1297.00 | 2.60    |
| 50O-4P-dD-2L-2 | 1146.48     | 1159.93   | 662      | 666    | 0    | 1216.25 | 4.86    | 2285     | 533    | 0    | 1222.25 | 5.37    | 14400    | 0    | 1234.75 | 6.45    |
| 50O-4P-dD-2L-3 | 1150.38     | 1174.65   | 360      | 3985   | 0    | 1241.50 | 5.69    | 901      | 2038   | 0    | 1207.50 | 2.80    | 4075     | 0    | 1276.25 | 8.65    |
| Average        |             | # opt.: 0 | 264.2    | 2286.7 | 1.33 | 1145.4  | 9.0     | 834.1    | 1743.0 | 0.22 | 1109.2  | 5.7     | 2729.9   | 0.25 | 1118.0  | 6.5     |
